# Supplementary material for: Processing characteristics of visuospatial working memory in map cognition by orienteering athletes: evidence from behavioral and EEG studies
Source: PeerJ journal article supplement (doi:10.7717/peerj.19817), 2025-09-03
Supplement: data1.xlsx [file data1.xlsx]

## Sheet: Sheet1
Storage of expert group																map recall scores	map recall times
theta	Frontal region	Central region	Parietal region	Temporal region	Occipital region		alpha	Frontal region	Central region	Parietal region	Temporal region	Occipital region			expert group	0.79	12.2143
1	0.739753	0.627251	0.708347	1.07488	1.55319			0.829565	0.606866	0.662469	0.825692	0.760182				0.8	9.64286
2	0.70866	0.694099	0.564455	0.946888	1.51116			0.706999	0.729156	0.516493	0.8376	1.0644				0.92	12.2857
3	0.817819	0.893709	0.749406	1.00224	0.514326			0.85426	0.815006	0.714541	0.960288	0.594927				0.84	8.92857
4	0.542135	0.488219	0.59781	0.819672	1.11878			0.674777	0.747149	0.610369	0.790587	0.66373				0.87	9.5
5	0.840639	0.750672	0.828716	0.969958	0.71268			0.64153	0.559227	0.529762	0.815905	0.60868				0.8	7.28571
6	0.832132	0.677864	0.670811	0.894194	1.18779			1.05872	0.848331	0.823941	1.06944	0.778327				0.83	10.2143
7	0.608299	0.391399	0.48925	0.556279	1.45996			0.689277	0.489808	0.532345	1.04439	0.610662				0.91	10.7214
8	0.897919	0.687473	0.751883	1.13022	0.696754			0.682909	0.584111	0.579422	1.13568	0.670283				0.88	8.92857
9	0.767644	0.687493	0.72452	1.09166	1.52383			0.618094	0.630771	0.52114	0.848295	0.823876				0.84	8.92858
10	0.874243	0.588229	0.702751	1.12598	0.670069			0.83309	0.642807	0.751688	1.17757	0.765277				0.86	9.57142
11	0.643216	0.47486	0.535996	0.817555	1.10977			0.654128	0.542753	0.659262	0.925146	0.748433				0.85	11.1071
12	0.716749	0.595287	0.806625	0.837796	1.20371			0.694571	0.627044	0.771991	0.854001	0.758165				0.87	9.07142
13	0.607584	0.615275	0.553139	0.881516	1.10543			0.791583	0.690864	0.639907	0.872143	0.968189				0.83	10.5714
14	0.607195	0.525917	0.556647	0.678667	0.80589			0.835957	0.496089	0.515787	0.652072	0.842157				0.91	10.5
15	0.711654	0.862233	0.756663	1.01041	0.672721			0.636437	0.772103	0.649689	1.01539	0.609377				0.95	12.4286
16	0.863462	0.669422	0.794729	1.36357	0.991303			0.641533	0.505348	0.489903	0.815775	0.60932				0.87	11.3214
17	0.67856	0.551633	0.696738	0.757645	1.06481			0.771759	0.794483	0.79504	0.875524	0.735006				0.86	10.5643
18	0.46803	0.470536	0.415363	0.768159	0.474752			0.544463	0.516005	0.439159	0.736646	0.563303				0.82	12
19	0.589196	0.798392	0.667976	1.19854	0.986569			0.534517	0.487201	0.423749	0.801021	0.391143				0.85	11.1593
20	0.704502	0.691833	0.698206	1.07041	0.666667			0.705735	0.763857	0.830469	1.03298	0.698961				0.88	10.3845
21	0.771199	0.668389	0.912832	1.41113	0.715409			0.850819	0.779138	0.954658	1.0344	0.831995				0.83	10.2355
22	0.562993	0.50788	0.437002	0.80615	0.529062			0.536094	0.538497	0.654554	0.835115	0.885592
Extraction of expert group																map recall scores	map recall times
theta	Frontal region	Central region	Parietal region	Temporal region	Occipital region		alpha	Frontal region	Central region	Parietal region	Temporal region	Occipital region			novice group	0.73	15.001
1	0.740536	0.621563	0.735641	1.05876	1.40901		1	0.690778	0.561575	0.641682	0.997103	0.97606				0.76	15.8372
2	0.820948	0.717505	0.519583	0.965486	1.20292		2	0.740119	0.70932	0.487259	0.957048	0.869606				0.75	10.7302
3	0.588311	0.513408	0.547975	0.871381	0.611485		3	0.76725	0.683519	0.726218	0.999233	0.572918				0.83	16.6289
4	1.01356	0.80811	0.762111	1.18031	0.854077		4	0.689222	0.597363	0.620642	0.695048	0.642423				0.67	14.7774
5	0.57582	0.637235	0.587084	0.762588	0.778507		5	0.778802	0.611247	0.652368	0.987141	0.708238				0.78	13.349
6	0.623003	0.43015	0.489845	0.772263	1.18844		6	0.757049	0.85611	0.723791	0.999274	0.75032				0.79	13.5854
7	0.827915	0.706228	0.643828	1.20648	0.714721		7	0.576764	0.328908	0.42419	0.510365	0.535864				0.78	17.7514
8	0.507947	0.444833	0.481232	0.770138	0.513363		8	0.770189	0.678664	0.712936	1.17996	0.817117				0.83	13.6345
9	0.75483	0.667488	0.860623	1.24015	1.33209		9	0.672054	0.627566	0.586757	0.856134	0.802201				0.7	12.1554
10	0.650019	0.484345	0.509126	0.792281	1.03586		10	0.832599	0.659963	0.790256	1.06247	0.77688				0.71	16.9032
11	0.849314	0.743584	0.595253	1.3945	1.11479		11	0.695218	0.549348	0.6179	0.871794	0.911071				0.74	13.7059
12	0.802322	0.718885	0.81223	0.931802	1.30179		12	0.728741	0.592142	0.816593	0.820832	0.850332				0.8	11.9229
13	0.60041	0.533667	0.432087	0.739187	0.772947		13	0.656224	0.569325	0.502062	0.848183	0.837478				0.79	18.0279
14	0.742674	0.88913	0.76376	0.96828	0.60866		14	0.648026	0.492476	0.483428	0.63058	0.829205				0.81	17.5847
15	0.539179	0.446969	0.53001	0.795856	0.614444		15	0.697951	0.716	0.71734	1.05078	0.674925				0.73	15.949
16	0.578742	0.551293	0.620853	0.970208	0.634878		16	0.62303	0.515286	0.473725	0.877161	0.577396				0.74	14.3932
17	0.804712	0.644829	0.815631	0.889293	1.08378		17	0.640257	0.619413	0.772157	0.801364	0.947009				0.74	14.0252
18	0.829186	0.862137	0.818321	1.07764	0.794047		18	0.529021	0.475713	0.412011	0.776498	0.51537				0.74	12.9779
19	0.846201	0.788576	0.810319	1.09568	0.802102		19	0.551697	0.432379	0.483562	0.722428	0.60129				0.8	12.753
20	0.842372	0.8614	0.555095	1.12316	0.722303		20	0.760719	0.56717	0.736912	1.10281	0.73564				0.78	14.7143
21	0.955119	0.727511	0.815928	1.27474	0.927262		21	0.741045	0.621367	0.898876	1.43739	0.910194				0.85	10.7857
22	0.872264	0.891035	0.903897	0.948702	1.0494		22	0.466596	0.482654	0.580822	0.770279	0.860426
Storage of novice group
theta	Frontal region	Central region	Parietal region	Temporal region	Occipital region		alpha	Frontal region	Central region	Parietal region	Temporal region	Occipital region
1	0.372889	0.26883	0.257828	0.404523	0.382376		1	0.530061	0.390745	0.491286	0.444343	0.558257
2	0.901524	0.812877	0.955761	1.18357	0.605434		2	0.62108	0.599479	0.628116	0.864481	0.438478
3	0.464529	0.333925	0.54205	0.503062	1.40472		3	0.541884	0.55447	0.583576	0.628053	0.747445
4	1.06929	1.05461	1.31226	1.13238	0.789271		4	0.794397	0.865693	0.818889	0.807437	0.676807
5	0.811635	0.690762	0.675364	0.911087	1.39483		5	0.774374	0.724209	0.62115	0.845203	0.718953
6	1.25595	1.07177	0.97101	1.80651	1.23833		6	0.834007	0.857593	0.847547	0.776483	0.875578
7	0.652577	0.552966	0.84869	0.896076	0.595379		7	0.476375	0.418571	0.545774	0.692895	0.498502
8	0.778219	0.586976	0.652796	0.822916	1.22379		8	0.636686	0.463719	0.499343	0.65358	0.704657
9	1.2031	0.859036	1.08731	1.27051	1.60026		9	0.67805	0.585163	0.642951	0.736858	0.682047
10	1.04274	0.936575	1.11097	1.71767	2.29548		10	0.70454	0.740667	0.671291	0.751879	0.750393
11	0.671073	0.492828	0.619498	0.868298	0.504669		11	0.488965	0.39858	0.403487	0.647639	0.542808
12	0.844276	0.706031	0.798927	0.968589	0.878974		12	0.617109	0.680306	0.653734	0.848947	0.835901
13	0.491481	0.627086	0.331062	0.77296	0.605197		13	0.481551	0.503115	0.459226	0.647629	0.500273
14	0.79928	0.51137	0.690425	0.849038	0.807578		14	0.585733	0.413669	0.479077	0.610838	0.565725
15	0.837972	0.788846	0.839865	1.132	0.579705		15	0.658999	0.615819	0.536791	0.69629	0.417028
16	0.354378	0.360605	0.353703	0.585138	0.321379		16	0.317154	0.431114	0.377035	0.535131	0.744052
17	0.411813	0.314903	0.316385	0.674843	1.05603		17	0.822656	0.683689	0.767263	0.882643	0.793798
18	1.22948	1.20178	1.29638	1.42255	1.59075		18	0.688162	0.483267	0.557821	0.765422	0.874342
19	0.836788	0.551985	0.645154	0.778997	1.0639		19	0.572649	0.496964	0.528089	0.725552	0.809161
20	0.661237	0.567555	0.611755	0.699225	0.974788		20	0.698479	0.651701	0.72308	0.796347	0.702497
21	1.11753	0.924791	0.964504	1.04795	1.54515		21	0.5204	0.496511	0.505909	0.555064	0.647112
22	0.654589	0.516389	0.636884	0.798732	0.878628		22	0.81454	0.740667	0.691291	0.718546	0.750393
Extraction of novice group
theta	Frontal region	Central region	Parietal region	Temporal region	Occipital region		alpha	Frontal region	Central region	Parietal region	Temporal region	Occipital region
1	0.565539	0.620924	0.665654	0.759371	1.13257		1	0.547841	0.612396	0.599012	0.694336	0.771395
2	0.654342	0.503409	0.456802	0.860506	0.78775		2	0.796328	0.460769	0.55955	0.549461	0.57556
3	0.914496	0.770376	0.926673	1.04746	0.479553		3	0.544502	0.442358	0.460747	0.745845	0.613824
4	0.685079	0.618229	0.664965	0.810164	1.24004		4	0.821265	0.719048	0.723626	0.883734	0.542842
5	1.25507	0.769819	0.830326	1.34763	1.28663		5	0.660439	0.621199	0.575442	0.818287	0.571726
6	0.972378	0.729999	0.936759	1.08554	0.850349		6	0.776016	0.661831	0.584914	0.743287	0.985215
7	0.714205	0.567264	0.660519	0.733389	0.90569		7	0.59315	0.495982	0.601771	0.795434	0.54581
8	1.07641	0.69924	0.854639	1.18323	1.54826		8	0.567444	0.444462	0.507268	0.580896	0.711488
9	0.652017	0.60019	0.502338	0.658257	0.903456		9	0.693647	0.5048	0.618382	0.698136	0.893791
10	0.401077	0.425312	0.341602	0.618295	0.409141		10	0.567338	0.539709	0.442916	0.630021	0.685064
11	0.628901	0.551341	0.525923	0.750143	0.770484		11	0.575334	0.562225	0.538247	0.582383	0.629002
12	0.827195	0.792793	0.893833	0.844476	1.59994		12	0.532681	0.520788	0.515171	0.609849	0.555951
13	1.13345	0.670262	0.711953	1.08374	1.17336		13	0.579943	0.560111	0.639469	0.489869	0.607329
14	0.861237	0.739038	0.84461	1.16951	0.56825		14	0.841206	0.437492	0.576761	0.714342	0.711292
15	0.868829	0.795779	0.843235	1.33043	0.638643		15	0.689497	0.664952	0.556243	0.723878	0.566702
16	0.904003	0.696867	0.744423	1.09665	1.29334		16	0.634063	0.490687	0.521689	0.811474	0.836775
17	0.550712	0.604749	0.554901	0.917155	1.1698		17	0.496233	0.466939	0.538479	0.687885	0.776166
18	0.638957	0.490402	0.381304	0.801421	0.257074		18	0.594785	0.459881	0.520988	0.587878	0.508985
19	0.907165	0.630384	0.629465	1.01798	1.06045		19	0.747484	0.586385	0.535407	0.806485	0.840438
20	0.85069	0.585791	0.637876	0.929982	1.19264		20	0.589755	0.457745	0.574543	0.6952	0.829646
21	0.85069	0.585791	0.657876	0.929982	1.19264		21	0.589755	0.521128	0.574543	0.661866	0.829646
22	1.02842	0.62611	0.631573	0.994912	1.19679		22	0.68923	0.428347	0.473617	0.72801	0.83469
